# Supplementary material for: Pregnancy Management in HIV Viral Controllers: Twenty Years of Experience
Source: MDPI journal article supplement (doi:10.3390/pathogens13040308), 2024-04-10
Supplement: s1 [file s1]

Supplementary table S1: Summary of HIV-1 RNA quantification assays used in reported cases

| Assay                                      | Manufacturer | Lower limit of quantification (LLOQ) |
|--------------------------------------------|--------------|--------------------------------------|
| RealTime                                   | Abbott       | 40                                   |
| Bayer's VERSANT bDNA 3.0                   | Bayer        | 75                                   |
| Quantiplex 3.0                             | Chiron       | 50                                   |
| Amplicor HIV-1 Monitor 1.5 sensitive       | Roche        | 400                                  |
| Amplicor HIV-1 Monitor 1.5 ultra-sensitive | Roche        | 50                                   |
| Ampliprep/COBAS Taqman 1                   | Roche        | 40                                   |
| Ampliprep/COBAS Taqman 2                   | Roche        | 20                                   |
| Aptima HIV 1 Quant Dx                      | Hologic      | 30                                   |
