# Supplementary material for: Pregnancy Management in HIV Viral Controllers: Twenty Years of Experience
Source: MDPI journal article supplement (doi:10.3390/pathogens13040308), 2024-04-10
Supplement: s1 [file s1]

Summary Table S2 | Summary table of baseline characteristics, immune parameters, ART regime, delivery and postpartum infant HIV status

| Patient (n=28) | Pregnancy Number | Year of Delivery | Age at booking /yrs | Diagnosed in current pregnancy | Region         | Co-morbidities |       |         |                       |           | Immune Parameters       |               |             |                        |                             |                             |                  |                                      |                                        |                        |                            |                                |             |      |      |       | ART in pregnancy | Gestation started ART /weeks | GA at delivery /weeks | Mode of delivery | IV ZDV at birth | VL at delivery copies/mL | Infant received 4 weeks ZDV | ART stopped PP | Mode of Feeding | 12-week DNA or RNA available | Infant Ab status available |
|----------------|------------------|------------------|---------------------|--------------------------------|----------------|----------------|-------|---------|-----------------------|-----------|-------------------------|---------------|-------------|------------------------|-----------------------------|-----------------------------|------------------|--------------------------------------|----------------------------------------|------------------------|----------------------------|--------------------------------|-------------|------|------|-------|------------------|------------------------------|-----------------------|------------------|-----------------|--------------------------|-----------------------------|----------------|-----------------|------------------------------|----------------------------|
|                |                  |                  |                     |                                |                | Hep B          | Hep C | Late TB | Hypertensive Disorder | Type 2 DM | Mental Health Diagnosis | Co-medication | Para        | CD4+ at diagnosis /mCL | CD4+ in this pregnancy /mCL | CD8+ in this pregnancy /mCL | CD4+: CD8+ ratio | HIV VL repeated on alternative assay | Maternal proviral DNA result available | Maternal DNA amplified | Detectable VL in pregnancy | VL during pregnancy copies/mL  |             |      |      |       |                  |                              |                       |                  |                 |                          |                             |                |                 |                              |                            |
| 1              | 1                | 1999             | 18                  | No                             | United Kingdom | No             | No    | No      | No                    | No        | No                      | No            | Nulliparous | 570                    | 670                         | 260                         | 1.9              | Yes                                  | No                                     | -                      | Yes                        | <50; <500; 579; <100; <50      | ZDV         | 30.0 | 39.0 | PLCS  | Yes              | <50                          | Yes                   | Yes              | Formula fed     | Yes, negative            | Yes, negative               |                |                 |                              |                            |
|                | 2                | 2001             | 19                  | No                             |                | No             | No    | No      | No                    | No        | No                      | No            | Multiparous |                        | 740                         | 460                         | 1.7              | -                                    | No                                     | -                      | No                         | <50                            | ZDV         | 32.0 | 38.0 | PLCS  | Yes              | <50                          | Yes                   | Yes              | Formula fed     | Yes, negative            | Yes, negative               |                |                 |                              |                            |
|                | 3                | 2017             | 36                  | No                             | United Kingdom | No             | No    | No      | No                    | No        | Yes                     | Yes           | Multiparous |                        | 594                         | 434                         | 1.4              | -                                    | No                                     | -                      | No                         | <20; <20; <20; <20; <20        | MRV/FTC/TDF | 0.0  | 38.0 | PLCS  | N/A              | <20                          | Yes                   | No               | Breast fed      | Yes, negative            | Yes, negative               |                |                 |                              |                            |
|                | 4                | 2021             | 40                  | No                             |                | No             | No    | No      | No                    | No        | Yes                     | Yes           | Multiparous |                        | 726                         | 459                         | 1.6              | -                                    | No                                     | -                      | No                         | <20; <20; <20; <20; <20        | MRV/FTC/TDF | 0.0  | 38.0 | PLCS  | N/A              | <20                          | Yes                   | No               | Formula fed     | Yes, negative            | Yes, negative               |                |                 |                              |                            |
| 2              | 1                | 1999             | 32                  | Yes                            | Ethiopia       | No             | No    | No      | No                    | No        | No                      | No            | Nulliparous | 500                    | 500                         | 330                         | 1.5              | Yes                                  | Yes                                    | not detected           | -                          | -                              | ZDV         | 28.0 | 38.0 | PLCS  | -                | -                            | Yes                   | Yes              | -               | -                        | Yes, negative               |                |                 |                              |                            |
|                | 2                | 2004             | 37                  | No                             |                | No             | No    | No      | No                    | No        | No                      | No            | Multiparous |                        | 500                         | 330                         | 1.5              | -                                    | Yes                                    | not detected           | No                         | <50; <50; <50                  | ZDV         | 28.0 | 38.0 | PLCS  | Yes              | <50                          | Yes                   | Yes              | Formula fed     | Yes, negative            | Yes, negative               |                |                 |                              |                            |
| 3              | 1                | 2000             | 30                  | Yes                            | -              | No             | No    | No      | No                    | No        | No                      | No            | Nulliparous | 350                    | 640                         | 520                         | 1.2              | Yes                                  | No                                     |                        | Yes                        | <50; <40; 179; <50             | ZDV         | 32.0 | 38.0 | PLCS  | N/A              | <50                          | Yes                   | Yes              | Formula fed     | Yes, negative            | Yes, negative               |                |                 |                              |                            |
|                | 2                | 2003             | 33                  | No                             |                | No             | No    | No      | No                    | No        | No                      | No            | Multiparous |                        | 660                         | 660                         | 1                | -                                    | No                                     | -                      | Yes                        | <50; 51; <50; <50; <50; <50    | ZDV         | 28.0 | 37.0 | PLCS  | N/A              | <50                          | Yes                   | Yes              | Formula fed     | Yes, negative            | Yes, negative               |                |                 |                              |                            |
| 4              | 1                | 2000             | 25                  | Yes                            | South Africa   | No             | No    | No      | Yes                   | No        | No                      | No            | Nulliparous | 460                    | 770                         | 1170                        | 0.5              | Yes                                  | Yes                                    | detected               | No                         | <50; <50; <50                  | ZDV         | 32.0 | 34.0 | emLCS | Yes              | <50                          | Yes                   | Yes              | Formula fed     | Yes, negative            | Yes, negative               |                |                 |                              |                            |
|                | 2                | 2006             | 32                  | No                             |                | No             | No    | No      | Yes                   | No        | No                      | No            | Multiparous |                        | 570                         | 960                         | 0.5              | -                                    | Yes                                    | detected               | Yes                        | 289; 237; 223; 145; 89; 78; 54 | ZDV         | 24.0 | 38.0 | PLCS  | N/A              | 54                           | Yes                   | Yes              | Formula fed     | Yes, negative            | Yes, negative               |                |                 |                              |                            |
| 5              | 1                | 2001             | -                   | Yes                            | Sierra Leone   | No             | No    | No      | No                    | Yes       | No                      | Yes           | Nulliparous | -                      | -                           | -                           | -                | -                                    | Yes                                    | not detected           | -                          | -                              | ZDV         | 28.0 | 38.0 | PLCS  | -                | -                            | Yes                   | Yes              | Formula fed     | -                        | Yes, negative               |                |                 |                              |                            |
|                | 2                | 2005             | -                   | No                             |                | No             | No    | No      | No                    | Yes       | No                      | Yes           | Multiparous | -                      | -                           | -                           | -                | -                                    | Yes                                    | not detected           | -                          | -                              | ZDV         | 28.0 | 38.0 | PLCS  | -                | -                            | Yes                   | Yes              | Formula fed     | -                        | Yes, negative               |                |                 |                              |                            |
|                | 3                | 2011             | -                   | No                             |                | No             | No    | No      | No                    | Yes       | No                      | Yes           | Multiparous | -                      | 682                         | 342                         | 2                | -                                    | Yes                                    | not detected           | -                          | -                              | ZDV         | 22.6 | 38.0 | PLCS  | Yes              | -                            | Yes                   | Yes              | Formula fed     | Yes, negative            | Yes, negative               |                |                 |                              |                            |
|                | 4                | 2019             | -                   | No                             |                | No             | No    | No      | No                    | Yes       | No                      | Yes           | Multiparous | 497                    | 780                         | 371                         | 2.1              | Yes                                  | Yes                                    | not detected           | Yes                        | 105; 44; <20; 0; <20           | ZDV         | 20.0 | 38.0 | PLCS  | No               | <20                          | No                    | Yes              | Formula fed     | Yes, negative            | No                          |                |                 |                              |                            |

|    |   |      |    |     |                |    |     |    |    |    |    |    |             |     |      |     |     |     |     |              |     |                         |              |      |      |      |     |     |     |     |             |               |               |
|----|---|------|----|-----|----------------|----|-----|----|----|----|----|----|-------------|-----|------|-----|-----|-----|-----|--------------|-----|-------------------------|--------------|------|------|------|-----|-----|-----|-----|-------------|---------------|---------------|
| 6  | 1 | 2001 | 31 | Yes | Ethiopia       | No | No  | No | No | No | No | No | Nulliparous | 486 | 519  | -   | -   | Yes | No  | -            | No  | <50                     | ZDV          | 32.0 | 36.0 | PLCS | N/A | <50 | -   | Yes | Formula fed | -             | -             |
|    | 7 | 2002 | 31 | No  | Zimbabwe       | No | No  | No | No | No | No | No | Nulliparous | 852 | 852  | -   | -   | Yes | Yes | not detected | No  | <50; <50                | ZDV          | 26.0 | 40.0 | PLCS | Yes | <50 | Yes | Yes | Formula fed | Yes, negative | Yes, negative |
| 8  | 2 | 2006 | 34 | No  |                | No | No  | No | No | No | No | No | Multiparous |     | 1227 | -   | -   | -   | Yes | not detected | No  | <50; <50; <50           | ZDV          | 30.0 | 38.0 | PLCS | Yes | -   | Yes | Yes | Formula fed | Yes, negative | Yes, negative |
|    | 1 | 2003 | 25 | No  | Macedonia      | No | No  | No | No | No | No | No | Nulliparous | 457 | 968  | -   | -   | Yes | No  | -            | No  | <50; <50; <50; <50      | ZDV          | 32.0 | 39.0 | PLCS | No  | <50 | Yes | Yes | Formula fed | -             | Yes, negative |
| 9  | 2 | 2005 | 27 | No  |                | No | No  | No | No | No | No | No | Nulliparous |     | 1159 | -   | -   | -   | No  | -            | No  | <50; <50; <50; <50      | ZDV          | 34.0 | 38.0 | PLCS | No  | <50 | Yes | Yes | Formula fed | -             | Yes, negative |
|    | 1 | 2004 | 33 | Yes | Tanzania       | No | No  | No | No | No | No | No | Nulliparous | 360 | 306  | -   | -   | Yes | No  | -            | No  | <50; <50; <50           | ZDV /FTC/NFV | 28.0 | 38.0 | PLCS | Yes | <50 | Yes | Yes | Formula fed | Yes, negative | Yes, negative |
| 10 | 1 | 2005 | 33 | No  | United Kingdom | No | No  | No | No | No | No | No | Nulliparous | 688 | 901  | -   | -   | Yes | Yes | detected     | No  | <50; <50; <50; <50      | ZDV          | 24.0 | 38.0 | PLCS | No  | <50 | Yes | Yes | Formula fed | Yes, negative | Yes, negative |
|    | 2 | 2006 | 34 | No  |                | No | No  | No | No | No | No | No | Multiparous |     | 979  | -   | -   | -   | Yes | detected     | No  | <50; <50; <50; <50      | ZDV          | 24.0 | 39.0 | PLCS | No  | <50 | Yes | Yes | -           | -             | Yes, negative |
| 11 | 1 | 2005 | 26 | Yes | Ivory Coast    | No | No  | No | No | No | No | No | Nulliparous | 551 | 685  | -   | -   | Yes | Yes | detected     | Yes | <50; 205                | ZDV /3TC/KAL | 31.0 | 39.0 | SVD  | No  | 205 | Yes | -   | Formula fed | Yes, negative | Yes, negative |
| 12 | 1 | 2005 | 26 | No  | Nigeria        | No | No  | No | No | No | No | No | Nulliparous | 708 | 670  | -   | -   | Yes | No  | -            | No  | <50; <50; <50; <50; <50 | ZDV          | 28.0 | 40.0 | PLCS | No  | <50 | Yes | Yes | Formula fed | Yes, negative | Yes, negative |
| 13 | 1 | 2006 | 26 | No  | United Kingdom | No | Yes | No | No | No | No | No | Nulliparous | 752 | 752  | -   | -   | Yes | Yes | detected     | No  | <50 <40                 | ZDV          | 24.0 | 38.0 | SVD  | No  | <40 | Yes | Yes | Formula fed | Yes, negative | No            |
|    | 2 | 2008 | 28 | No  |                | No | Yes | No | No | No | No | No | Multiparous |     | 1023 | -   | -   | -   | Yes | detected     | Yes | 87; <40; <40; <40       | ZDV          | 24.0 | 38.0 | PLCS | No  | <40 | Yes | Yes | Formula fed | Yes, negative | No            |
| 14 | 3 | 2012 | -  | No  |                | No | Yes | No | No | No | No | No | Multiparous |     | 1121 | 968 | 1.2 | Yes | Yes | detected     | No  | 29; <20                 | ZDV          | 20.4 | 38.0 | PLCS | No  | <20 | Yes | Yes | Formula fed | Yes, negative | No            |
|    | 1 | 2006 | 31 | Yes | Nigeria        | No | No  | No | No | No | No | No | Nulliparous | 638 | 1119 | -   | -   | Yes | No  | -            | Yes | 95; <50; <50; <50       | TDF/3TC/ KAL | 24.0 | 39.0 | SVD  | No  | <50 | Yes | Yes | Formula fed | Yes, negative | Yes, negative |
| 15 | 1 | 2006 | 27 | Yes | South Africa   | No | No  | No | No | No | No | No | Nulliparous | 826 | 947  | -   | 1.5 | Yes | Yes | detected     | No  | <50; <50; <50; <50      | ABC/3TC/ ZDV | 32.0 | 41.0 | SVD  | No  | <50 | Yes | Yes | Formula fed | Yes, negative | Yes, negative |
| 16 | 1 | 2007 | 22 | Yes | Bangladesh     | No | No  | No | No | No | No | No | Nulliparous | 741 | 784  | -   | 1.3 | Yes | Yes | detected     | No  | 0; 0; 0; 0              | ZDV          | 29.0 | 41.0 | SVD  | No  | 0   | Yes | Yes | Formula fed | Yes, negative | Yes, negative |

|   |      |    |     |                 |     |    |     |     |    |    |     |                 |     |      |      |     |     |                     |                     |                                 |                                        |                   |      |           |           |         |     |     |                    |                      |                      |                      |
|---|------|----|-----|-----------------|-----|----|-----|-----|----|----|-----|-----------------|-----|------|------|-----|-----|---------------------|---------------------|---------------------------------|----------------------------------------|-------------------|------|-----------|-----------|---------|-----|-----|--------------------|----------------------|----------------------|----------------------|
| 2 | 2011 | 26 | No  |                 | No  | No | No  | No  | No | No | No  | Multipa<br>rous | 784 | -    | -    | -   | Yes | not<br>detec<br>ted | Yes                 | 80;<br><40; 0;<br>211;<br>55; 0 | ZDV                                    | 30.0              | 40.0 | emL<br>CS | No        | 0       | Yes | Yes | Form<br>ula<br>fed | Yes,<br>negati<br>ve | Yes,<br>negati<br>ve |                      |
| 1 | 2007 | 27 | Yes | Polan<br>d      | No  | No | No  | No  | No | No | No  | Nullipa<br>rous | 778 | 697  | -    | -   | Yes | -No                 | -                   | Yes                             | 0; <50;<br><50;<br>6084;<br><40<br><50 | ZDV               | 28.0 | 32.0      | emL<br>CS | Ye<br>s | <50 | Yes | Yes                | Form<br>ula<br>fed   | Yes,<br>negati<br>ve | Yes,<br>negati<br>ve |
| 1 | 2007 | 33 | Yes | Nigeri<br>a     | Yes | No | No  | No  | No | No | No  | Nullipa<br>rous | 357 | 335  | -    | -   | -   | Yes                 | detec<br>ted        | No                              | <40;<br><40                            | TDF/3TC/<br>KAL   | 33.0 | 41.0      | SVD       | No      | <40 | Yes | Yes                | -                    | Yes,<br>negati<br>ve | Yes,<br>negati<br>ve |
| 1 | 2008 | 30 | Yes | Nigeri<br>a     | No  | No | No  | No  | No | No | No  | Nullipa<br>rous | 504 | 547  | -    | -   | Yes | Yes                 | not<br>detec<br>ted | Yes                             | 100;<br><50;<br><50                    | ZDV               | 28.0 | 39.0      | PLC<br>S  | No      | <50 | -   | No                 | Form<br>ula<br>fed   | Yes,<br>negati<br>ve | Yes,<br>negati<br>ve |
| 1 | 2008 | 35 | No  | Eritrea         | No  | No | No  | No  | No | No | No  | Nullipa<br>rous | 430 | 530  | 700  | 0.7 | Yes | Yes                 | detec<br>ted        | No                              | <50;<br><50                            | ZDV               | 28.0 | 39/0      | emL<br>CS | Ye<br>s | <50 | Yes | Yes                | -                    | Yes,<br>negati<br>ve | Yes,<br>negati<br>ve |
| 1 | 2008 | 32 | No  | Kenya           | No  | No | No  | No  | No | No | Yes | Nullipa<br>rous | 977 | 502  | -    | -   | Yes | Yes                 | not<br>detec<br>ted | Yes                             | <40;<br>173;<br>88;<br><50; 0;<br><40  | ZDV               | 28.0 | 38.0      | PLC<br>S  | Ye<br>s | <40 | Yes | Yes                | Form<br>ula<br>fed   | Yes,<br>negati<br>ve | Yes,<br>negati<br>ve |
| 1 | 2009 | 34 | Yes | Rwan<br>da      | No  | No | No  | No  | No | No | No  | Nullipa<br>rous | 931 | 1043 | -    | -   | Yes | Yes                 | not<br>detec<br>ted | No                              | <40;<br><40;<br><40;<br><40            | ZDV               | 26.0 | 39.0      | SVD       | No      | <40 | Yes | Yes                | -                    | Yes,<br>negati<br>ve | -                    |
| 1 | 2011 | 30 | Yes | Nigeri<br>a     | No  | No | Yes | No  | No | No | Yes | Nullipa<br>rous | 776 | 743  | 434  | 1.7 | Yes | Yes                 | not<br>detec<br>ted | No                              | <40;<br><40;<br><40;<br><40;<br><40    | ABC/3TC/<br>ZDV   | 24.0 | 41.0      | PLC<br>S  | No      | <40 | Yes | Yes                | Form<br>ula<br>fed   | Yes,<br>negati<br>ve | No                   |
| 2 | 2013 | 32 | No  |                 | No  | No | No  | No  | No | No | No  | Multipa<br>rous | 612 | 287  | -    | -   | Yes | not<br>detec<br>ted | No                  | 0; 0; 0;<br>0; 0; 0             | ABC/3TC/<br>ZDV                        | 25.0              | 38.0 | PLC<br>S  | No        | 0       | Yes | Yes | Form<br>ula<br>fed | Yes,<br>negati<br>ve | Yes,<br>negati<br>ve |                      |
| 1 | 2011 | 33 | No  | South<br>Africa | No  | No | No  | No  | No | No | No  | Nullipa<br>rous | 770 | 768  | -    | -   | Yes | Yes                 | not<br>detec<br>ted | No                              | 0; 0;<br><40; 0                        | ABC/3TC/<br>ZDV   | 28.0 | 41.0      | PLC<br>S  | No      | 0   | Yes | Yes                | Form<br>ula<br>fed   | Yes,<br>negati<br>ve | -                    |
| 1 | 2012 | 33 | No  | Nigeri<br>a     | No  | No | No  | No  | No | No | No  | Nullipa<br>rous | 514 | 514  | 582  | 0.9 | Yes | Yes                 | detec<br>ted        | No                              | <40; 0;<br>0; 0                        | TDF/FTC/<br>ATV/r | 13.0 | 40.0      | emL<br>CS | No      | 0   | Yes | Yes                | Form<br>ula<br>fed   | Yes,<br>negati<br>ve | Yes,<br>negati<br>ve |
| 2 | 2014 | 35 | No  |                 | No  | No | No  | No  | No | No | No  | Multipa<br>rous | 393 | -    | -    | Yes | Yes | detec<br>ted        | No                  | 0; 0; 0;<br>0; 0; 0             | ATV/r/FTC<br>/TDF                      | 29.4              | 40.0 | VBA<br>C  | No        | 0       | Yes | Yes | Form<br>ula<br>fed | Yes,<br>negati<br>ve | Yes,<br>negati<br>ve |                      |
| 3 | 2018 | 39 | No  |                 | No  | No | No  | No  | No | No | No  | Multipa<br>rous | 412 | 607  | 0.7  | -   | Yes | detec<br>ted        | No                  | 0; 0; 0;<br>0; 0; 0             | RAL/FTC/<br>TDF                        | 7.4               | 38.0 | emL<br>CS | No        | 0       | Yes | Yes | Form<br>ula<br>fed | Yes,<br>negati<br>ve | Yes,<br>negati<br>ve |                      |
| 1 | 2012 | -  | No  | Jamai<br>ca     | No  | No | No  | No  | No | No | No  | Nullipa<br>rous | 651 | 972  | 699  | 1.4 | Yes | Yes                 | detec<br>ted        | Yes                             | 52; 38;<br><20;<br><20                 | ZDV               | 23.0 | 40.0      | SVD       | No      | <20 | Yes | Yes                | Form<br>ula<br>fed   | Yes,<br>negati<br>ve | Yes,<br>negati<br>ve |
| 1 | 2016 | -  | Yes | Nigeri<br>a     | Yes | No | No  | No  | No | No | No  | Nullipa<br>rous | 455 | 455  | 1120 | 0.4 | Yes | Yes                 | detec<br>ted        | No                              | <20;<br><20;<br><20                    | RPV/FTC/<br>TDF   | 18.3 | 37.0      | emL<br>CS | No      | <20 | Yes | No                 | Form<br>ula<br>fed   | Yes,<br>negati<br>ve | Yes,<br>negati<br>ve |
| 1 | 2019 | -  | No  | Zambi<br>a      | No  | No | No  | Yes | No | No | Yes | Nullipa<br>rous | 952 | 975  | 875  | 1.1 | Yes | No                  | -                   | Yes                             | 78; 41;<br><20;<br><20                 | RPV/TDF/<br>FTC   | 22.7 | 39.0      | SVD       | No      | <20 | Yes | No                 | Mixed                | Yes,<br>negati<br>ve | -                    |

|    |   |      |    |     |        |    |    |    |    |    |    |     |             |   |      |   |      |   |   |     |    |                             |              |      |      |       |    |     |         |     |            |               |               |
|----|---|------|----|-----|--------|----|----|----|----|----|----|-----|-------------|---|------|---|------|---|---|-----|----|-----------------------------|--------------|------|------|-------|----|-----|---------|-----|------------|---------------|---------------|
| 29 | 1 | 2012 | 24 | Yes | Anqola | No | No | No | No | No | No | Yes | Nulliparous | 1 | 2012 | - | -    | - | - | Yes | No | <50                         | ATV/rZDV/3TC | -    | 39.0 | PLCS  | -  | <50 | -       | Yes | Formulated | Yes, negative | -             |
|    | 2 | 2014 | 27 |     |        | No | No | No | No | No | No | Yes | Multiparous | 2 | 2014 | - | 1050 | - | - | -   | No | <50;<br><50;<br><50;<br><50 | ZDV          | 28.0 |      | VBA C | No | <50 | Yes     | Yes | Formulated | Yes, negative | Yes, negative |
|    | 3 | 2021 | 33 |     |        | No | No | No | No | No | No | Yes | Multiparous | 3 | 2021 | - | 1030 | - | - | -   | No | <50;<br><50;<br><50;<br><50 | RAL/FTC/TDF  |      |      | VBA C | No | <50 | 14 days | Yes | Formulated | Yes, negative | Yes, negative |

Abbreviations: HIV, Human Immunodeficiency Virus-1; Hep B, hepatitis B; Hep C, hepatitis C; TB, Tuberculosis; CD4+, cluster of differentiation; CD8+, cluster of differentiation 8; VL, viral load; ART, antiretroviral therapy; GA, gestational age; IV, intravenous; ZDV, Zidovudine; N/A, not applicable; PP, postpartum; Ab, antibody; MRV, Maraviroc; FTC, Emtricitabine; TDF, Tenofovir disoproxil fumarate; 3TC, Lamivudine; KAL, kaletra (lopinavir/ritonavir); ABC, Abacavir; ATV/r, Atazanavir/ritonavir; RAL, Raltegravir; RPV, Rilpivirine; PLCS, planned caesarean section; emLCS, emergency caesarean section; SVD, spontaneous vaginal delivery.
